# Supplementary material for: An alkynyl-protected Au40 nanocluster featuring PhCC–Au–P^P motifs
Source: Royal Society of Chemistry journal article supplement (doi:10.1039/c8cc06665e), 2018-01-01
Supplement: c8cc06665e1.pdf [file c8cc06665e1.pdf]

## Supporting Information

### **Alkynyl-Protected Au<sub>40</sub> Nanocluster featuring a PhC≡C–Au–P staple**

Ting wang<sup>1</sup>, Wen-Han Zhang<sup>1</sup>, Shang-Fu Yuan<sup>1</sup>, Zong-Jie Guan<sup>1</sup>, and Quan-Ming Wang<sup>1,2,\*</sup>

<sup>1</sup>Department of Chemistry, College of Chemistry and Chemical Engineering, Xiamen University, Xiamen, 361005, P. R. China.

<sup>2</sup>Department of Chemistry, Tsinghua University, Beijing, 100084, P. R. China.

#### **Contents**

#### **I. Physical measurements**

#### **II. Experimental Details**

#### **III. Characterization**

**Figure S1.** TGA of cluster **1**.

**Figure S2.** ESI-TOF-MS spectrum of cluster **1**.

**Figure S3.** Time-dependent UV-Vis spectra of **1** for monitoring stability.

**Table S1.** Crystal data and structure refinement for cluster **1**.

## I. Physical measurements

UV-vis-NIR absorption spectra were recorded on Cary 5000. Mass spectra were recorded on Agilent Technologies ESI-TOF-MS. NMR data were recorded on a Bruker Avance II spectrometer (500MHz).  $^{31}\text{P}$  chemical shifts were referenced to external 85%  $\text{H}_3\text{PO}_4$ . Thermogravimetric analysis (TGA) was performed on TG\_209F1.

**X-ray Crystallography.** Intensity data of compound **1** were collected on an Agilent SuperNova Dual system (Cu  $K\alpha$ ). Absorption corrections were applied by using the program CrysAlis (multi-scan). The structure was solved by direct methods, and non-hydrogen atoms were refined anisotropically by least-squares on  $F^2$  using the SHELXTL program. All the phenyl groups were refined using a rigid model (AFIX 66). SQUEEZE tool of PLATON was applied in the structure of **1**, due to large solvent voids.

## II. Experimental Details

**Materials and reagents.** Ethynylbenzene ( $\text{PhC}\equiv\text{CH}$ , 98%), Sodium hexafluoroantimonate ( $\text{NaSbF}_6$ , 99%), Bis(diphenylphosphino)methane (dppm, 98%) were purchased from J&K; Silver trifluoroacetate ( $\text{AgOOCF}_3$ , 98.0 %) were purchased from Strem Chemicals Inc.; Sodium borohydride ( $\text{NaBH}_4$ , 98%) and other reagents employed were purchased from Sinopharm Chemical Reagent Co. Ltd. (Shanghai, China). All reagents were used as received without further purification.

### **dppm(AuOOCF<sub>3</sub>)<sub>2</sub>**

The synthesis of  $\text{dppm}(\text{AuOOCF}_3)_2$  is entirely different from  $\text{PPh}_3\text{AuX}$  ( $\text{X} = \text{SbF}_6$  and  $\text{CF}_3\text{SO}_3$ )<sup>1-3</sup>. To obtain the solution of  $\text{dppm}(\text{AuOOCF}_3)_2$ , a solution of  $\text{CF}_3\text{COOAg}$  (8.8 mg, 0.04 mmol) in 0.1 mL  $\text{CH}_3\text{OH}$  was added dropwise to the solution of  $\text{Me}_2\text{SAuCl}$  (11.8 mg, 0.04 mmol) in 3 mL  $\text{CH}_2\text{Cl}_2$  with vigorous stirring, and the solution turned into a suspension immediately. The reaction continued for 15 min at room temperature in the dark obtaining the  $\text{AgCl}$  precipitate and a solution of  $\text{Me}_2\text{SAuOOCF}_3$  which could be stable in solution owing to the coordination ability of the  $\text{CF}_3\text{COO}^-$ . While the anions possessing weaker coordination ability of the other silver salts (eg.  $\text{AgSbF}_6$ ,  $\text{AgNO}_3$  and  $\text{AgOTf}$ ) are not able to stabilize the  $\text{Me}_2\text{SAu}^+$  solution. Then, the resulting solution was centrifuged for 3 min at 9000 r/min, and the  $\text{AgCl}$  precipitate was filtered off. The dppm (5.7 mg, 0.02 mmol) was added to the solution of  $\text{Me}_2\text{SAuOOCF}_3$  obtaining the solution of  $\text{dppm}(\text{AuOOCF}_3)_2$ . This method to synthesize the solution  $\text{LAuOOCF}_3$  is effective for phosphine ligands, especially for those phosphine ligands whose  $\text{R}_3\text{PAuCl}$  compounds are not soluble.

### **[Au<sub>40</sub>(PhC≡C)<sub>20</sub>(dppm)<sub>4</sub>](SbF<sub>6</sub>)<sub>4</sub>**

To 4 mL  $\text{CH}_2\text{Cl}_2$  solution of  $\text{dppm}(\text{AuOOCF}_3)_2$  (0.04 mmol),  $\text{PhC}\equiv\text{CAu}$  (47.7 mg, 0.16 mmol) was added. And a freshly prepared solution of  $\text{NaBH}_4$  (0.76 mg in 1 mL of ethanol) was added dropwise under vigorous stirring. The solution color changed from orange to pale brown and finally to dark brown. 30 min later,  $\text{NaSbF}_6$  (52 mg, 0.2 mmol) was added and the reaction continued for 24 h at room temperature in air in the dark. The mixture was evaporated to dryness to give a dark solid, which was dissolved in 1 mL  $\text{CH}_2\text{Cl}_2$  and 1 mL  $\text{CH}_2\text{Cl}-\text{CH}_2\text{Cl}$  centrifuged for 3 min at 9000 r/min. The supernatant solution was subject to the diffusion of n-hexane to afford 3.3 mg brown-red crystals after two weeks (5.3 % yield based on Au).

### Reference

(1) Wan, X.-K.; Yuan, S.-F.; Tang, Q.; Jiang, D.-e.; Wang, Q.-M., *Angew. Chem. Int. Ed.* **2015**, *54*, 5977.

(2) Wan, X.-K.; Wang, J.-Q.; Nan, Z.-A.; Wang, Q.-M., *Science Advances* **2017**, *3*.

(3) Wan, X.-K.; Xu, W. W.; Yuan, S.-F.; Gao, Y.; Zeng, X.-C.; Wang, Q.-M., *Angew. Chem. Int. Ed.* **2015**, *54*, 9683.

### III. Characterization

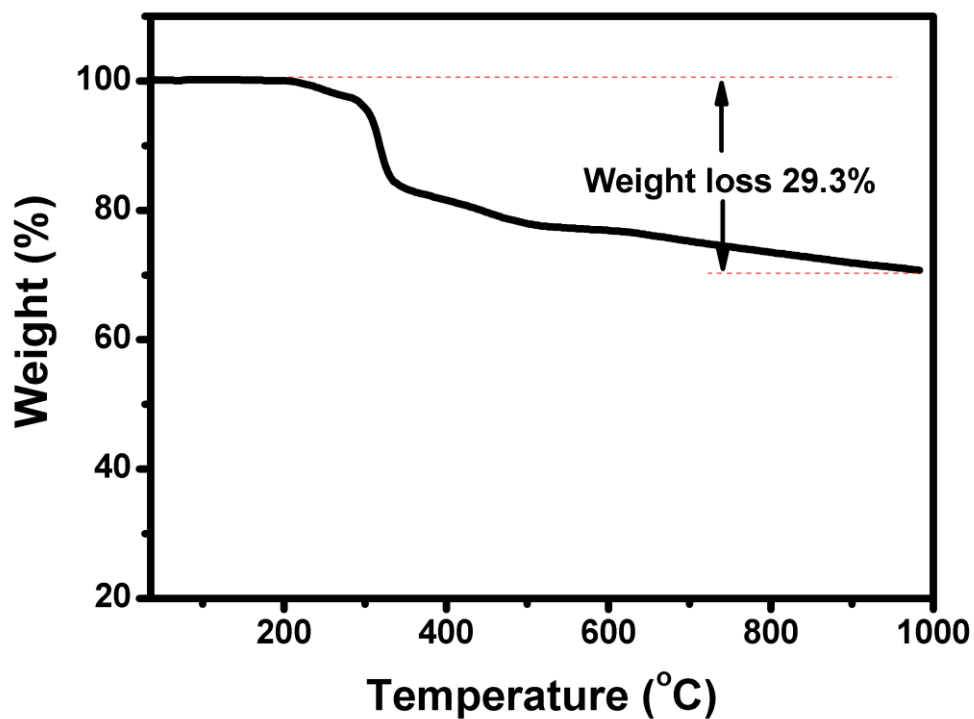

Figure S1. TGA of cluster 1.

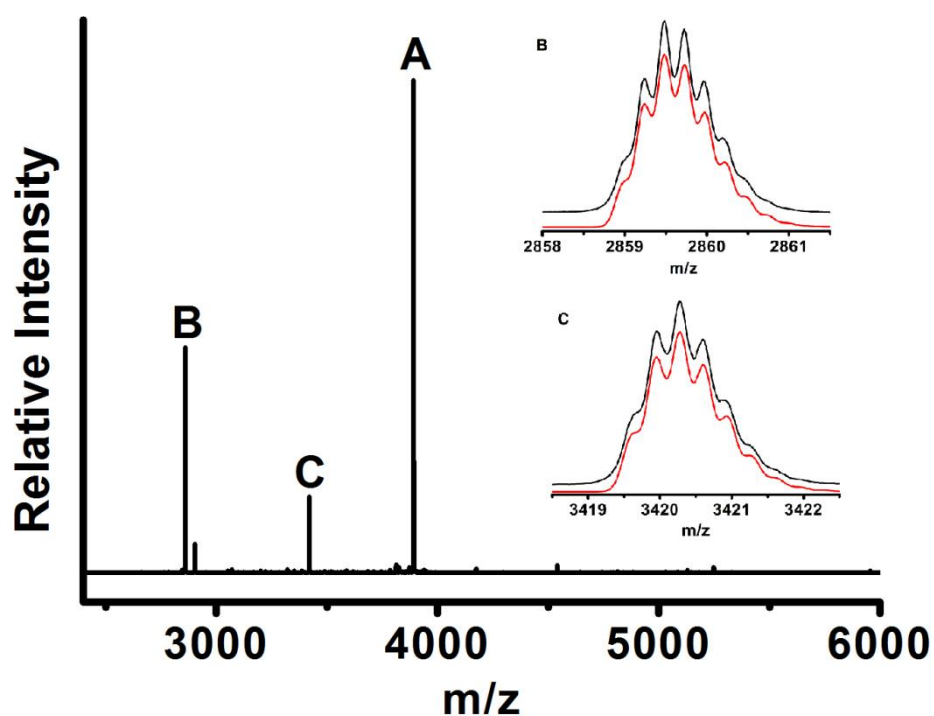

**Figure S2.** ESI-TOF-MS spectrum of cluster **1**. Inset: the measured (black trace) and simulated (red trace) isotopic patterns. (A)  $[\text{Au}_{40}(\text{PhC}\equiv\text{C})_{20}(\text{dppm})_4\text{SbF}_6]^{3+}$ ; (B)  $[\text{Au}_{40}(\text{PhC}\equiv\text{C})_{20}(\text{dppm})_4]^{4+}$  (C)  $[\text{Au}_{37}(\text{PhC}\equiv\text{C})_{18}(\text{dppm})_3]^{3+}$ .

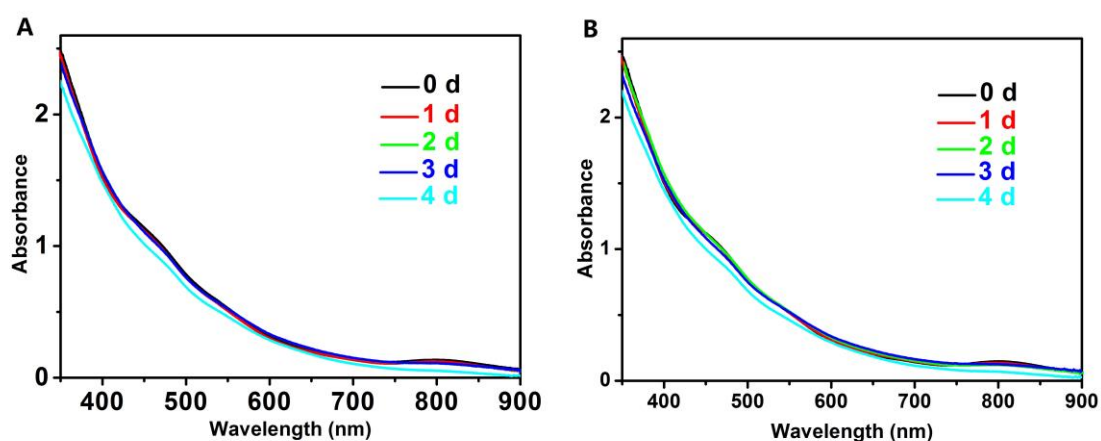

**Figure S3.** Time-dependent UV-Vis spectra of **1** for monitoring stability. (A) under ambient conditions in  $\text{CH}_2\text{Cl}_2$ ; (B) under ambient conditions in  $\text{CH}_2\text{Cl}_2$  in dark.

**Table S1.** Crystal data and structure refinement for [Au<sub>40</sub>(PhC≡C)<sub>20</sub>(dppm)<sub>4</sub>](SbF<sub>6</sub>)<sub>4</sub>.

|                                   |                                                                                                                                                                   |
|-----------------------------------|-------------------------------------------------------------------------------------------------------------------------------------------------------------------|
| Empirical formula                 | C <sub>263</sub> H <sub>194</sub> Au <sub>40</sub> Cl <sub>4</sub> F <sub>24</sub> P <sub>8</sub> Sb <sub>4</sub>                                                 |
| Formula weight                    | 12565.39                                                                                                                                                          |
| Temperature                       | 173.00(10) K                                                                                                                                                      |
| Wavelength                        | 1.54184 Å                                                                                                                                                         |
| Crystal system, space group       | monoclinic, <i>C2/c</i>                                                                                                                                           |
| Unit cell dimensions              | $a = 41.9547(10) \text{ \AA}$ $\alpha = 90^\circ$<br>$b = 18.5701(3) \text{ \AA}$ $\beta = 117.333(3)^\circ$<br>$c = 44.4220(11) \text{ \AA}$ $\gamma = 90^\circ$ |
| Volume                            | 30745.3(14) Å <sup>3</sup>                                                                                                                                        |
| Z, Calculated density             | 4, 2.715 g/cm <sup>3</sup>                                                                                                                                        |
| Absorption coefficient            | 38.741 mm <sup>-1</sup>                                                                                                                                           |
| F(000)                            | 22160.0                                                                                                                                                           |
| Crystal size                      | 0.08 × 0.03 × 0.02 mm                                                                                                                                             |
| Theta range for data collection   | 7.624 to 122.338                                                                                                                                                  |
| Limiting indices                  | -47 ≤ h ≤ 47, -16 ≤ k ≤ 21, -45 ≤ l ≤ 50                                                                                                                          |
| Reflections collected             | 74308                                                                                                                                                             |
| Independent reflections           | 23118 [R <sub>int</sub> = 0.0969, R <sub>sigma</sub> = 0.0779]                                                                                                    |
| Data/restraints/parameters        | 23118/890/1410                                                                                                                                                    |
| Goodness-of-fit on F <sup>2</sup> | 1.057                                                                                                                                                             |
| Final R indices [I > 2σ(I)]       | R <sub>1</sub> = 0.0927, wR <sub>2</sub> = 0.2476                                                                                                                 |
| R indices (all data)              | R <sub>1</sub> = 0.1062, wR <sub>2</sub> = 0.2615                                                                                                                 |
| Largest diff. peak and hole       | 4.36/-5.56 e.Å <sup>-3</sup>                                                                                                                                      |
